# Supplementary material for: A spontaneous genetically induced epiallele at a retrotransposon shapes host genome function
Source: eLife. 2021 Mar 23;10:e65233. doi: 10.7554/eLife.65233 (PMC8084528; doi:10.7554/eLife.65233)
Supplement: Figure 1—figure supplement 2—source data 1. [file elife-65233-fig1-figsupp2-data1.xlsx]

## Sheet: Sheet1
Panels B and C.
	Indv. 1		Indv. 2		Indv. 3		Indv. 4		Indv. 5		Indv. 6		Indv. 7		Indv. 8		Indv. 9
CpG site	% Methylation	Std. deviation (triplicates)	% Methylation	Std. deviation (triplicates)	% Methylation	Std. deviation (triplicates)	% Methylation	Std. deviation (triplicates)	% Methylation	Std. deviation (triplicates)	% Methylation	Std. deviation (triplicates)	% Methylation	Std. deviation (triplicates)	% Methylation	Std. deviation (triplicates)	% Methylation	Std. deviation (triplicates)
5′ border_-9	76.13	3.352	63.78	1.01823	64.835	1.32229	76.15	7.05445	60.595	1.52028	61.16	2.54558	70.7867	3.30216	61.11	0.636396	65.875	0.586899
5′ border_-8	63.54	3.56421	54.92	0.169706	57.15	0.452548	55.0367	4.58683	49.645	2.67993	50.25	0.806102	52.5833	3.20511	47.61	1.76777	51.56	1.9799
5′ border_-6	23.7033	0.850078	28.1	2.29103	30.815	0.176777	21.85	0.914112	27.705	0.205061	27.7	0.622254	19.0367	2.71857	28.99	2.92742	28.835	0.615183
5′ border_-6	37.7167	0.717937	50.74	1.21622	54.86	2.47487	34.08	2.24609	49.205	0.912168	49.09	0.268701	32.94	1.14643	47.475	0.657609	53.295	0.289914
5′ border_-4	90.17	4.1561	86.005	0.544472	83.38	0.905097	91.0667	0.664555	81.325	1.15258	80.785	2.07182	89.1	0.0424264	76.85	0.650538	80.85	1.00409
5′ border_-3	90.9367	2.40666	91.73	5.58614	93.58	3.60624	92.09	1.61975	90.915	0.92631	87.205	3.62746	91.51	1.30736	87.19	1.64049	87.895	0.968736
5′ border_-2	49.1333	2.94385	47.6	0.0565685	50.805	1.0253	37.2867	3.20597	43.23	0.650538	42.47	0.777817	25.3367	2.32769	35.23	0.622254	35.33	1.10309
5′ border_-1	88.4	3.39687	79.1833	1.44417	82.64	0.86267	55.7367	0.690604	51.94	0.254558	52.6333	0.489115	21.14	2.08847	23.2367	0.548483	20.55	0.212132
5′ LTR_1	98.6833	2.28053	98.65	1.07037	98.9133	0.988956	64.4033	4.99396	65.2533	1.00152	64.2	0.329697	11.4467	0.790274	7.45	0.0888819	12.7	0.457384
5′ LTR_2	92.34	2.32058	91.9133	1.07547	93.14	1.56387	58.5967	2.87446	61.0733	0.382143	59.8833	0.554106	9.77	0.836242	6.46	0.228692	10.98	0.663626
5′ LTR_3	91.9733	1.18069	89.4033	0.790021	89.5267	0.0757188	62.0833	2.14346	58.57	0.417253	58.3333	0.865871	11.79	0.765049	6.89	0.32078	11.43	0.361663
5′ LTR_4	93.0533	0.470567	94.7	0.775048	95.37	0.575587	60.3633	3.09523	60.9933	0.606163	60.4533	0.517333	10.7167	0.737857	8.35333	0.436157	12.95	0.454313
3′ LTR_197	93.5933	0.532666	95.0067	0.333217	94.89	0.345109	67.2967	1.93505	62.67	1.66964	67.53	0.457056	20.16	0.407799	15.8667	0.710023	22.9333	0.700095
3′ LTR_198	99.3833	1.0681	99.6933	0.531162	100	0	75.84	3.21762	69.2433	2.87187	76.0867	1.6007	28.9467	1.71832	25.1767	1.00927	33.3533	1.97318
3′ LTR_199	86.0233	0.570731	84.35	1.56119	83.79	1.19202	64.63	1.28643	58.6033	1.6524	61.9433	1.83903	22.2467	0.527763	16.4967	1.42075	23.8567	1.40834
3′ LTR_200	96.2933	0.337095	97.1	0.428836	96.83	0.34641	75.4267	1.8858	68.5067	2.53547	73.8933	1.67384	31.2433	0.590113	25.0167	1.30852	33.1667	1.93291
3′ LTR_201	90.3967	0.418848	90.2133	0.851136	89.79	0.429302	67.3433	1.66401	62.8467	2.14211	66.9733	0.553745	23.91	0.405093	21.2067	0.600111	28.8533	0.979915
3′ border_1	96.6867	3.25288	96.59	3.07765	96.9933	1.08685	82.15	2.17143	85.0533	0.763697	83.1867	2.39669	66.4233	0.685371	66.0133	0.349476	68.86	0.461844
3′ border_2	93.36	0.674463	95.8367	0.0723418	95.9833	0.818189	81.71	1.32525	84.0667	0.20108	84.69	0.635295	65.7467	1.29083	69.38	1.21025	69.3967	0.68391
3′ border_3	100	0	100	0	100	0	81.43	1.76689	84.4367	2.08572	87.2533	1.50839	51.8167	0.520032	53.5833	2.41479	57.2167	0.245832
3′ border_4	81.3133	1.59318	81.5867	0.190351	81.88	0.360971	68.5067	0.588586	65.19	0.41328	65.42	0.317648	52.86	0.36756	49.0933	0.615982	52.61	0.827224
3′ border_5	91.86	0.157162	92.6133	0.483356	92.7367	0.224796	88.3267	0.289194	86.4133	0.458294	87.64	0.563116	82.4833	0.918713	81.47	0.158745	80.8	0.867468
3′ border_6	62.25	1.74851	69.4767	2.75264	66.8667	1.04887	66.605	1.18087	65.52	0.69419	68.72	2.57758	65.55	0.314325	65.6367	0.795005	67.6133	0.247857
3′ border_7	71.4333	1.58752	72.5133	0.492375	71.24	3.50766	72.72	1.28693	72.6933	0.37018	71.86	2.99847	75.9	2.56146	76.2367	0.863848	77.29	0.746659
3′ border_8	81.57	3.68827	89.6933	3.2527	93.87	0.66468	84.0667	0.715705	88.7967	0.915223	91.6933	2.72245	87.67	2.37622	89.68	2.04668	87.9233	1.65775
3′ border_9	86.2033	1.4561	87.53	0.669552	85.635	0.417193	86.4467	0.321299	86.3067	1.43001	87.9067	0.578821	86.4567	0.739076	87.1767	0.0873689	87.1233	0.378197
3′ border_10	79.6567	0.900074	79.93	0.396611	80.315	0.0777817	78.69	1.40865	80.3233	0.366788	80.7167	0.562168	79.9533	0.581922	80.7567	0.304357	77.6067	1.21233
Panel D.
	H x H	L x L	L x H	M x M	L x M	M x H
Maternal Avg. % Methylation	93.6342	5.76833	10.1175	67.3225	3.96333	58.635
Paternal Avg. % Methylation	95.6075	3.10833	87.9317	60.2208	61.9425	94.605
Offspring Avg. % Methylation	95.0475	7.7375	64.0275	67.2117	62.6525	67.1162
	95.3467	5.63667	58.2683	94.4975	7.09333	97.0438
	96.3542	12.0108	52.4067	94.2383	13.265	62.1487
	96.3325	4.68333	54.6742	66.3333	64.7592	96.26
	94.9192	8.70333	53.6742	64.6067	66.18	63.8687
	93.7908	8.32167	55.0492	61.3617	65.0058	68.5362
	95.1942	7.77917	61.9425	63.905	15.6625	96.0608
	95.3067	6.97583		61.97	3.06333	96.3525
	95.1233	15.7992		10.9308	4.78667	96.0258
	94.0883	6.58917		58.3733	5.95833	61.7225
	95.6058	9.67833		60.33	6.36417	95.5483
	94.2767	4.46833		65.65	67.45	67.49
	94.1692	4.33917		94.0125	64.7008	96.5225
	94.63	6.27833		93.6642		95.3133
	93.91	5.94833		93.6667		92.6042
	94.4196	3.7925		61.4725		60.2208
	94.4392	5.05917		94.2375		63.625
	93.7783	6.99833		60.7175		63.8125
	94.8675	9.1575		61.7892		63.79
				61.0392		62.6183
				7.28833		94.9567
				12.015		63.4092
				94.2308
				64.7508
				11.9292
				95.6192
Figure 1 - figure supplement 2.
Males.
	B6 male 1		B6 male 2		B6 male 3		B6 male 4		B6 male 5		B6 male 6		B6 male 7		B6 male 8		B6 male 9		B6 male 10		B6 male 11
CpG site	% Methylation	Std. deviation (triplicates)	% Methylation	Std. deviation (triplicates)	% Methylation	Std. deviation (triplicates)	% Methylation	Std. deviation (triplicates)	% Methylation	Std. deviation (triplicates)	% Methylation	Std. deviation (triplicates)	% Methylation	Std. deviation (triplicates)	% Methylation	Std. deviation (triplicates)	% Methylation	Std. deviation (triplicates)	% Methylation	Std. deviation (triplicates)	% Methylation	Std. deviation (triplicates)
1	63.6833	1.85907	98.6833	2.28053	99.4667	0.92376	98.65	1.07037	65.2533	1.00152	98.9133	0.988956	68.0167	1.18407	12.3267	0.690604	8.41	0.705053	9.61667	0.623779	13.89	0.356791
2	59.5933	1.20956	92.34	2.32058	91.8333	2.59808	91.9133	1.07547	61.0733	0.382143	93.14	1.56387	63.9033	0.421584	10.0433	0.617117	7.80667	0.708543	15.0067	0.420991	12.9833	0.0650641
3	58.8533	0.906936	91.9733	1.18069	91.13	1.57991	89.4033	0.790021	58.57	0.417253	89.5267	0.0757188	63.1867	1.10192	11.8667	0.704651	7.35	0.793725	22.2567	0.611337	12.25	0.472864
4	59.19	0.47697	93.0533	0.470567	92.2267	0.669801	94.7	0.775048	60.9933	0.606163	95.37	0.575587	63.8967	0.775715	13.48	0.927739	6.49	0.821645	12.36	0.44456	10.67	0.41328
Females.
	B6 female 1		B6 female 2		B6 female 3		B6 female 4		B6 female 5		B6 female 6		B6 female 7		B6 female 8		B6 female 9		B6 female 10		B6 female 11		B6 female 12
CpG site	% Methylation	Std. deviation (triplicates)	% Methylation	Std. deviation (triplicates)	% Methylation	Std. deviation (triplicates)	% Methylation	Std. deviation (triplicates)	% Methylation	Std. deviation (triplicates)	% Methylation	Std. deviation (triplicates)	% Methylation	Std. deviation (triplicates)	% Methylation	Std. deviation (triplicates)	% Methylation	Std. deviation (triplicates)	% Methylation	Std. deviation (triplicates)	% Methylation	Std. deviation (triplicates)	% Methylation	Std. deviation (triplicates)
1	65.94	0.244336	11.4467	0.790274	62.3633	0.593492	64.2	0.329697	64.8433	0.652253	64.3167	1.11289	7.45	0.0888819	12.7	0.457384	97.9567	0.801582	99.9733	0.046188	99.5767	0.733235	99.6433	0.617765
2	60.63	0.200749	9.77	0.836242	57.79	1.81695	59.8833	0.554106	61.7933	0.95007	60.9867	1.14893	6.46	0.228692	10.98	0.663626	94.3567	0.765136	95.4133	1.66212	97.0133	0.582866	94.99	1.02235
3	60.64	0.513907	11.79	0.765049	57.24	1.22282	58.3333	0.865871	60.2033	2.10529	58.4333	1.64628	6.89	0.32078	11.43	0.361663	89.7433	0.37072	93.26	0.989293	92.9967	1.4665	94.2767	1.11384
4	60.67	1.31286	10.7167	0.737857	56.1	1.0916	60.4533	0.517333	60.3167	1.48194	60.42	1.44167	8.35333	0.436157	12.95	0.454313	94.8667	1.24468	95.5967	0.287286	95.8233	0.161967	95.1933	0.311823
