# Supplementary material for: A spontaneous genetically induced epiallele at a retrotransposon shapes host genome function
Source: eLife. 2021 Mar 23;10:e65233. doi: 10.7554/eLife.65233 (PMC8084528; doi:10.7554/eLife.65233)
Supplement: Figure 2—source data 1. [file elife-65233-fig2-data1.xlsx]

## Sheet: Sheet1
Panel F.
GV oocytes Avg. % Methylation		Sperm Avg. % Methylation		Blastocysts Avg. % Methylation		ESCs Avg. % Methylation		E16.5 embryos Avg. % Methylation		E16.5 placentas Avg. % Methylation
Iap5-1full	Iap5-1solo	Iap5-1full	Iap5-1solo	Iap5-1full	Iap5-1solo	Iap5-1full	Iap5-1solo	Iap5-1full	Iap5-1solo	Iap5-1full	Iap5-1solo
80.9244	3.53222	94.4392	91.7585	71.7675	2.88	88.4688	6.10833	94.5208	21.1858	79.9033	6.5275
86.7822	22.5012	93.8542	90.2027	53.5067	12.1167	91.7537	5.77667	93.9517	7.30167	79.2208	3.71
72.4613	6.59194			74.7324	16.4175	89.3075	6.4075
				60.8225	13.3189	83.8088
