# Supplementary material for: A spontaneous genetically induced epiallele at a retrotransposon shapes host genome function
Source: eLife. 2021 Mar 23;10:e65233. doi: 10.7554/eLife.65233 (PMC8084528; doi:10.7554/eLife.65233)
Supplement: Figure 3—source data 1. [file elife-65233-fig3-data1.xlsx]

## Sheet: Sheet1
Panel A.
	Enrichment (% input)
	Iap5-1full				Iap5-1solo
IAP-Asxl3 5' end
IgG	0.00607428	0.0222805	0.0159746		0.04044	0.0372124	0.0128412
H3K9me3	2.11686	2.24533	3.2197		3.37978	3.49896	2.72627
SINE-Rbak 5' end
IgG	0.00611653	0.0190631	0.00722357		0.0184777	0.0331908	0.00512557
H3K9me3	2.65172	2.61521	3.64755		3.27598	3.35643	2.71684
Gapdh promoter
IgG	0.0100054	0.0265882	0.00134045		0.0193963	0.0190631	0.00804288
H3K9me3	0.217175	0.256482	0.409498		0.332616	0.435857	0.271106
Iap5-1 5' end
IgG	0.013955	0.0202902	0.00460344		0.0163669	0.0190631	0.00795969
H3K9me3	3.23088	2.96273	3.58489		0.715453	0.931048	0.595399
Iap5-1 3' end
IgG	0.00075143	0.00946572	0.00432504		0.0184138	0.033306	0.00671651
H3K9me3	2.95248	3.16439	3.97768		0.98073	1.20742	2.03768
