# Supplementary material for: A spontaneous genetically induced epiallele at a retrotransposon shapes host genome function
Source: eLife. 2021 Mar 23;10:e65233. doi: 10.7554/eLife.65233 (PMC8084528; doi:10.7554/eLife.65233)
Supplement: Figure 4—figure supplement 1—source data 1. [file elife-65233-fig4-figsupp1-data1.xlsx]

## Sheet: Sheet1
Panel B.						Panel C.							Figure 4 - figure supplement 1.
	B6 female x CAST male (BC)		CAST female x B6 male (CB)			Avg. % Methylation
	Iap5-1full	Iap5-1solo	Iap5-1full	Iap5-1solo		F0 (B6)	F1 (BC)	F1 (CB)	N1 (C x F1)	N2 (C x N1)	B6 x N5		Control (C) diet - all offpsring
Parental Avg. % Methylation (B6)	93.8733	6.015	90.0292	9.04333		7.7375	14.4025	24.0767	16.785	20.6517	6.5375			Indv. C1	Indv. C2	Indv. C3	Indv. C4	Indv. C5	Indv. C6	Indv. C7	Indv. C8	Indv. C9	Indv. C10	Indv. C11	Indv. C12	Indv. C13	Indv. C14	Indv. C15	Indv. C16	Indv. C17	Indv. C18	Indv. C19	Indv. C20	Indv. C21	Indv. C22	Indv. C23	Indv. C24	Indv. C25	Indv. C26	Indv. C27	Indv. C28	Indv. C29	Indv. C30	Indv. C31	Indv. C32	Indv. C33	Indv. C34	Indv. C35	Indv. C36
Offspring Avg. % Methylation	96.6975	14.4025	94.475	24.0767		5.63667	20.7108	4.83583	27.5225	43.52	7.0875		CpG 1 % Methylation	8.3	18.0567	23.7033	11.9467	7.94	23.1967	8.65333	13.39	8.37333	10.5867	11.4833	4.62	11.8867	6.42333	10.93	7.3	5.30667	12.2967	13.4167	5.43333	6.015	8.92333	26.8467	15.5733	7.57	10.3933	8.17333	11.22	5.28667	9.04333	6.11	5.24667	9.38	8.51667	7.10667	6.61333
	97.8325	20.7108	94.7933	4.83583		12.0108	19.335	13.8158	19.1825	22.24	8.40167		CpG 2 % Methylation	5.76	13.1167	17.86	8.68333	5.66333	18.7567	6.4	10.4733	6.16333	8.31333	9.57	4.07667	11.0933	3.99	6.99333	3.78333	2.74667	7.44	9.79	3.22667	3.26	6.47667	20.78	12.0067	5.09667	8.03333	5.40667	9.52333	4.39	6.92	3.24	2.42333	6.28333	4.70667	4.16333	3.29333
	96.2417	19.335	94.4325	13.8158		4.68333	19.3133	15.3842	16.9775	31.0217	7.4675		CpG 3 % Methylation	4.99667	11.8233	16.99	7.42333	4.23333	16.755	4.64	8.75667	4.67333	6.64333	7.77667	3.15667	10.2233	4.57	8.88667	4.74333	3.03333	8.65333	9.62333	2.89333	3.175	5.77333	18.5167	9.66667	4.08333	6.46333	4.61333	8.58667	3.54	6.56333	3.65333	2.93	7.09333	4.80667	4.51	3.02333
	95.1458	19.3133	95.54	15.3842		8.70333	21.9821	15.73	12.405	15.4525	7.12917		CpG 4 % Methylation	5.59667	13.1	17.0667	8.46	5.98333	17.08	5.72	9.37333	4.94667	6.96333	8.015	4.04	9.71667	5.46333	7.39	4.90333	4.05	8.30333	11.17	4.01333	4.265	6.05333	19.1533	10.59	5.05	7.07	5.885	9.38333	4.51667	7.05667	5.61667	4.2	7.07667	6.02667	5.71	4.69667
	93.035	21.9821	94.8533	15.73		8.32167	9.70083	11.5367	16.9692	21.9442	10.4542		CpG Avg. % Methylation	6.16333	14.0242	18.905	9.12833	5.955	18.9471	6.35333	10.4983	6.03917	8.12667	9.21125	3.97333	10.73	5.11167	8.55	5.1825	3.78417	9.17333	11	3.89167	4.17875	6.80667	21.3242	11.9592	5.45	7.99	6.01958	9.67833	4.43333	7.39583	4.655	3.7	7.45833	6.01417	5.3725	4.40667
	96.1792	9.70083	90.23	11.5367		7.77917	17.5875	15.0733	18.9992	31.6883	10.0237
	95.6575	17.5875	90.8567	15.0733		6.97583	16.585	18.9692	21.0283	24.9175	8.54375		Control (C) diet - litter averages
	93.7167	16.585	91.7392	18.9692		15.7992	16.2983	12.8192	24.6708	28.5225				Litter C1	Litter C2	Litter C3	Litter C4	Litter C5	Litter C6	Litter C7	Litter C8
	93.87	16.2983	89.9533	12.8192		6.58917	11.8783	15.6092	15.3292	17.0742			CpG 1 % Methylation	14.0519	11.9267	9.38	8.8	6.14278	11.4417	9.51238	7.16933
	96.0767	11.8783	89.6567	15.6092		9.67833	17.9817	12.3917	35.7317	20.1308			CpG 2 % Methylation	10.1748	8.70381	6.28333	5.68778	3.39	7.87667	7.14381	5.632
		17.9817	89.5725	12.3917		4.46833	8.60167	6.48333	18.0308	23.1608			CpG 3 % Methylation	9.47476	7.79071	7.09333	5.36944	3.57278	7.64833	6.23238	5.188
		8.60167	89.6008	6.48333		4.33917	13.1333	13.7908	13.5908	17.1175			CpG 4 % Methylation	10.2929	8.48905	7.07667	5.93	4.675	7.63333	7.2481	5.83667
		13.1333	94.1017	13.7908		6.27833	14.4617	19.84	24.3025	26.8817			CpG Avg. % Methylation	10.9986	9.22756	7.45833	6.44681	4.44514	8.65	7.53417	5.9565
		14.4617	93.9633	19.84		5.94833	18.9175	15.5383	27.4833	23.9175
		18.9175	94.2075	15.5383		3.7925	3.88167	26.3383	19.7142	16.1642
				26.3383		5.05917	14.6292	32.3229	29.1758	18.2325
				32.3229		6.99833	10.9675	20.2925	26.9217	47.5542			Methyl supplemented (MS) diet - all offspring
						9.1575	19.505	9.81333	16.9408	23.5987				Indv. MS1	Indv. MS2	Indv. MS3	Indv. MS4	Indv. MS5	Indv. MS6	Indv. MS7	Indv. MS8	Indv. MS9	Indv. MS10	Indv. MS11	Indv. MS12	Indv. MS13	Indv. MS14	Indv. MS15	Indv. MS16	Indv. MS17	Indv. MS18	Indv. MS19	Indv. MS20	Indv. MS21	Indv. MS22	Indv. MS23	Indv. MS24	Indv. MS25	Indv. MS26	Indv. MS27	Indv. MS28	Indv. MS29	Indv. MS30	Indv. MS31	Indv. MS32	Indv. MS33	Indv. MS34	Indv. MS35	Indv. MS36
						10.1825	14.2292	14.3092	19.3267	18.3642			CpG 1 % Methylation	8.72333	16.24	11.1633	8.58	7.67	7.44333	7.315	9.98333	14.2	10.5367	7.97333	10.4633	7.53	3.55	4.64	4.73	3.91	22.53	19.1533	5.63	5.67	26.8033	6.71	9.45667	6.93667	7.25	11.7567	9.83667	8.99	10.3567	7.06667	13.5	8.355	7.74667	13.0533	16.79
						5.71333	15.35	27.1283	15.0567	8.51833			CpG 2 % Methylation	5.38333	13.3533	7.52333	5.72	4.45333	5.01333	5.4	7.68333	11.3167	7.39667	6.22	7.97333	6.26	3.48667	4.20667	3.66333	3.5	19.0267	14.6333	3.65333	3.90333	21.9433	4.34333	6.44333	4.58333	4.92	7.59	6.41333	6.32333	7.76667	4.36667	11.82	6.365	3.74333	8.90333	12.2667
						10.1817	13.5008	24.7	36.2683	28.3458			CpG 3 % Methylation	4.77333	11.02	6.49	4.10667	3.63	3.76667	4.205	6.02333	9.49	4.73667	5.34333	8.17	5.12	2.55	3.085	3.56	2.81333	17.3467	15.3433	3.71667	3.26333	22.0767	4.40333	6.37667	4.5	4.45	7.25667	5.9	5.04333	6.89667	2.54	10.4067	6.04	4.52333	9.49	11.8333
						5.55083	8.59833	14.1508	15.1917	26.2283			CpG 4 % Methylation	6.29333	11.0833	8.8	6.31333	4.68333	5.65	4.42	6.36333	9.42	6.87667	5.53	7.98333	5.67667	3.61	3.78	3.78	3.85333	17.2033	15.1367	4.47	3.95333	20.805	4.12667	6.92	4.43	6.345	9.31667	5.86	5.60333	6.5	4.97	11.6667	6.34	5.80667	11.0067	12.3
						6.015	18.0842	32.5158	33.2375	27.4142			CpG Avg. % Methylation	6.29333	12.9242	8.49417	6.18	5.10917	5.46833	5.335	7.51333	11.1067	7.38667	6.26667	8.6475	6.14667	3.29917	3.92792	3.93333	3.51917	19.0267	16.0667	4.3675	4.1975	22.9071	4.89583	7.29917	5.1125	5.74125	8.98	7.0025	6.49	7.88	4.73583	11.8483	6.775	5.455	10.6133	13.2975
						3.61333	20.6367	13.4975	19.3975	23.3325
						3.88167	17.9625	21.1333	19.6433	25.5367
						14.3442	15.1883	22.7875	14.8433	25.1117			Methyl supplemented (MS) diet - litter averages
						3.93833	19.7775	33.7233	13.2842	14.2883				Litter MS 1	Litter MS 2	Litter MS 3	Litter MS 4	Litter MS 5	Litter MS 6	Litter MS 7	Litter MS 8
						14.3058	11.1904	50.2921	14.1033	13.0608			CpG 1 % Methylation	12.0886	8.56111	10.9389	13.4644	8.00278	9.81133	8.32139	7.66875
						5.54	9.70083	33.1125	39.8133	19.4525			CpG 2 % Methylation	8.37714	5.67778	7.97889	9.77444	5.80889	7.096	6.17139	6.19917
						8.13333	6.6825	25.6033	22.2225	19.8			CpG 3 % Methylation	7.90095	4.95889	7.33111	9.44111	4.87722	6.01867	5.92611	5.42812
						7.09333	11.76	20.1617	48.2717	36.3042			CpG 4 % Methylation	8.89952	6.28778	7.58444	10.2972	4.97	6.922	6.41611	6.26354
						13.265	8.42958	21.9867	24.0167	25.7075			CpG Avg. % Methylation	9.31655	6.37139	8.45833	10.7443	5.91472	7.462	6.70875	6.3899
						15.6625	7.72417	22.6933	37.0775	14.0708
						3.06333	9.7275	16.7742	29.8825	12.56
						4.78667	10.3375	23.0892	48.0975	18.7367
						5.95833	15.3933	10.8733	16.1783	25.7133
						6.36417	10.2617	20.6217	14.1575	9.7575
						13.0008	14.3175	28.9983	37.8133	12.5842
						7.51417	16.5692	32.3858	39.0583	30.9175
						14.81	14.035	15.1383	23.1617	15.4483
						6.46417	6.33167	16.885	30.9417	29.6192
						12.4483	5.7825	16.1867	37.9933	30.0562
						10.16	10.8025	11.2192	31.7842	21.4258
						10.4658	7.35333	21.9075	24.6971	20.2017
						10.0267	8.55417	23.6133	29.6233	20.1475
						19.1858	7.22583	10.1942	42.1442	9.51917
						7.3925	8.63833	16.7475	51.4742	20.2908
						6.36083	9.235	17.3617	20.4058	20.4208
						5.63917	6.3775	17.3408	35.4642	26.8917
						9.7425	8.59125	34.4963	40.6017	17.4517
						5.69417	11.03	13.4325	34.95	17.9163
						4.73833	8.25875	19.67	24.8175	20.5958
						11.8375	9.28375	20.1667	46.7575	19.8483
						3.42		11.77	33.4508	21.1292
						6.60875		13.5333	32.865	21.5867
						3.7375		22.7792	45.0075	16.5075
						10.5038		20.8775	16.1683	13.6975
						12.2475		20.88	38.5283	23.7613
						6.43125		14.7475	29.8033	23.74
						6.605		12.4217	33.9217	25.6567
						10.9308		22.0233	16.5108	18.0608
						7.28833		12.8292	74.2567	22.5263
						12.015		12.22	16.825	17.9442
						11.9292		11.8242	24.2475	14.7767
								15.8	23.1608	16.5642
								13.8508	23.5742	16.045
								13.3775	19.1433	26.405
								11.6642	47.5542	20.9558
								13.5517	34.6233	27.6392
								14.9542	29.1017	21.915
								21.5425	32.085	20.2992
								11.2842	26.5067	16.9467
								13.9358	23.7842	23.4675
								16.805	33.6608	26.2283
								18.1892	23.9975
								6.81333	40.7233
								18.6867	18.1133
									34.395
									34.9725
									24.6408
									47.8713
									44.6375
[truncated: 5 more columns]
