# Supplementary material for: A spontaneous genetically induced epiallele at a retrotransposon shapes host genome function
Source: eLife. 2021 Mar 23;10:e65233. doi: 10.7554/eLife.65233 (PMC8084528; doi:10.7554/eLife.65233)
Supplement: Figure 5—source data 1. [file elife-65233-fig5-data1.xlsx]

## Sheet: Sheet1
RT-qPCR data.
Tissue	Genotype	Relative gene expression normalised to Hprt and β-actin expression					Relative transcription normalised to β-actin expression
		Rell1 (exon 7)	5830416l19Rik (exon 3)	Pgm2 (exon 9)	Tbc1d1 (exon 3)		5' border_1	5' border_2	3' border_1	3' border_2
Thymus	Iap5-1full	0.03669	0.00104	0.01785	0.02452		2.32167e-07	6.53522e-06	0	5.93984e-08
		0.03573	0.00099	0.01411	0.02232		5.65749e-07	7.25128e-06	0	6.91833e-08
		0.04048	0.00091	0.01482	0.02396		4.29176e-06	1.20551e-05	0	1.94328e-07
		0.02328	0.00085	0.00817	0.0156		6.66604e-07	7.48967e-06	0	1.39813e-07
		0.03054	0.00079	0.01028	0.02091
		0.03001	0.00092	0.00966	0.01955
	Iap5-1solo	0.03992	0.00522	0.0175	0.0198		5.00363e-05	0.000124491	9.88089e-05	0.000111552
		0.05725	0.00844	0.02415	0.02889		6.01254e-05	0.000173033	0.000124204	0.000115486
		0.04274	0.00434	0.01471	0.01818		6.2534e-05	0.000146177	7.97034e-05	8.0816e-05
		0.05975	0.00612	0.02074	0.02426		5.96411e-05	0.000175448	0.000188912	0.000140222
		0.0361	0.00384	0.01312	0.01845
		0.04938	0.00653	0.01858	0.02666
Cortex	Iap5-1full	0.10819	Not expressed	0.01926	0.02332		0	4.10817e-07	0	0
		0.08319	Not expressed	0.01385	0.02459		0	1.96742e-05	0	0
		0.06911	Not expressed	0.01042	0.01764		0	3.17401e-05	0	0
		0.07984	Not expressed	0.01471	0.02448		0	3.77892e-05	0	0
		0.06527	Not expressed	0.01056	0.02211
		0.07834	Not expressed	0.01292	0.02377
	Iap5-1solo	0.06374	Not expressed	0.01555	0.02366		4.06964e-06	7.05986e-05	5.13929e-06	5.13929e-06
		0.06935	Not expressed	0.01652	0.02733		2.12821e-05	9.15551e-05	1.9995e-05	1.9995e-05
		0.07398	Not expressed	0.01482	0.02026		1.19442e-05	9.8467e-05	4.36094e-05	4.36094e-05
		0.06927	Not expressed	0.01545	0.02583		6.99619e-06	5.48176e-05	2.66593e-05	2.66593e-05
		0.06264	Not expressed	0.01448	0.02535
		0.07229	Not expressed	0.01698	0.02106
Liver	Iap5-1full	0.09984	Not expressed	0.01821	0.01107
		0.13001	Not expressed	0.01608	0.01125
		0.06911	Not expressed	0.01124	0.00887
		0.07762	Not expressed	0.00997	0.00903
		0.08548	Not expressed	0.01284	0.00789
		0.10031	Not expressed	0.01199	0.00823
	Iap5-1solo	0.08425	Not expressed	0.0131	0.01064
		0.0472	Not expressed	0.01269	0.00686
		0.04772	Not expressed	0.01173	0.00924
		0.04546	Not expressed	0.01252	0.00952
		0.04737	Not expressed	0.01057	0.00711
		0.08367	Not expressed	0.0162	0.01413
Placenta	Iap5-1full	1.59107	Not expressed	0.78277	0.29765
		1.59844	Not expressed	0.61914	0.22952
		1.27456	Not expressed	0.50464	0.20733
		1.03526	Not expressed	0.31064	0.14161
	Iap5-1solo	1.73708	Not expressed	0.86254	0.26981
		1.81085	Not expressed	0.87661	0.26794
		1.82766	Not expressed	1.05702	0.14934
		1.65481	Not expressed	0.84675	0.23031
