# Supplementary material for: A spontaneous genetically induced epiallele at a retrotransposon shapes host genome function
Source: eLife. 2021 Mar 23;10:e65233. doi: 10.7554/eLife.65233 (PMC8084528; doi:10.7554/eLife.65233)
Supplement: Figure 5—source data 2. [file elife-65233-fig5-data2.xlsx]

## Sheet: Sheet1
Glucose tolerance tests.										Metabolic biomarkers
	Blood Glucose (mg/dL)							Weight (g)			Albumin (g/L)	ALT (U/L)	Cholesterol (mmol/L)	Triglycerides (mmol/L)	HDL (mmol/L)	LDL (mmol/L)	Glucose (mmol/L)	Insulin (ug/L)	Leptin (ug/L)	NEFA (umol/L)	Adiponectin (ng/ml)	Corticosterone (ng/ml)	Glucagon (pg/ml)
Time post injection:	0 min	15 min	30 min	45 min	60 min	90 min	120 min			Iap5-1full - Indv. A	24.7	41	2.6	1.05	1.68	0.443	15.3	0.415	991.257	451.952	26088.2	202.42	5.283
Iap5-1full - Indv. 1	185.587	405.409	304.508	302.706	279.282	230.633	200.002	33.8		Iap5-1full - Indv. B	27	36	2.7	1.1	1.71	0.5	15.2	0.56	6649	609	30174	350	9.7
Iap5-1full - Indv. 2	189.191	326.129	291.895	239.642	246.849	223.426	198.2	33.1		Iap5-1full - Indv. C	23	54	2.1	1.4	1.26	0.2	11.2	0.63	837	843	27876	495
Iap5-1full - Indv. 3	82.8837	371.175	345.949	290.093	246.849	190.993	136.938	26.8		Iap5-1full - Indv. D	25	36	2.8	1.2	1.53	0.7	14	1.24	2323	596	24041	324	15.2
Iap5-1full - Indv. 4	79.2801	203.606	181.984	172.975	151.353	133.335	106.307	29.3		Iap5-1full - Indv. E	23.75	36	2.7	1.1	1.56	0.6	15.9	0.78	1072	604	25214	423	16.4
Iap5-1full - Indv. 5	165.767	187.389	227.029	203.606	192.795	178.38	158.56	30.8		Iap5-1full - Indv. F	23	36	2.3	1.4	1.43	0.2	17.4	0.93	1269	796	23697	426	11.6
Iap5-1full - Indv. 6	162.164	353.157	223.426	291.895	237.84	189.191	169.371	29.6		Iap5-1full - Indv. G	23	36	1.6	0.7	0.9	0.4	9.7	1.73	1454	480	34578	394	58.9
Iap5-1full - Indv. 7	104.506	295.498	320.724	275.678	241.444	200.002	181.984	28.7		Iap5-1full - Indv. H	23	100	2.5	1.1	1.66	0.3	11.3	0.47	3251	748	26844	334
Iap5-1full - Indv. 8	111.713	308.111	291.895	273.877	245.048	169.371	181.984	27.9		Iap5-1full - Indv. I	22.23	49	2.3	1.1	1.41	0.4	13.1	0.47	980	612	22064	304	4.3
Iap5-1full - Indv. 9	100.902	281.084	308.111	281.084	266.669	201.804	163.966	28.3
Iap5-1full - Indv. 10	109.911	329.733	263.066	268.471	272.075	190.993	174.777	29.8		Iap5-1solo - Indv. A	24.7	54	2.4	0.81	1.47	0.562	12.8	0.309	409.717	784.386	24522.8	116.29	7.059
Iap5-1full - Indv. 11	104.506	376.58	241.444	219.822	178.38	140.542	151.353	22.5		Iap5-1solo - Indv. B	27	36	2.3	0.8	1.39	0.5	13.1	0.53	991	631	27667	330	11.4
Iap5-1full - Indv. 12	91.8928	335.139	403.608	331.535	221.624	149.551	140.542	23.2		Iap5-1solo - Indv. C	27	88	2.2	0.8	1.32	0.5	12.9	0.71	624	530	24542	265	32.1
										Iap5-1solo - Indv. D	27	36	1.4	0.5	0.81	0.4	7.1	0.66	690	753	35842	291	5.1
Iap5-1solo - Indv. 1	93.6946	228.831	295.498	273.877	214.417	169.371	138.74	27.5		Iap5-1solo - Indv. E	25	59	2.1	1.3	1.49	0.2	10	0.43	1721	744	29295
Iap5-1solo - Indv. 2	100.902	318.922	311.715	286.489	236.038	163.966	142.344	29.4		Iap5-1solo - Indv. F	25	57	2.1	1	1.35	0.3	9	0.41	474	730	22859	631
Iap5-1solo - Indv. 3	185.587	371.175	237.84	237.84	196.398	162.164	136.938	27.3		Iap5-1solo - Indv. G	27	112	1.9	0.7	1.31	0.3	12.1	0.63	1383	391	27573
Iap5-1solo - Indv. 4	172.975	302.706	281.084	255.858	212.615	203.606	172.975	29.8		Iap5-1solo - Indv. H	23	39	2.2	0.9	1.44	0.4	11.7	0.52	325	730	22541	129	6.2
Iap5-1solo - Indv. 5	117.118	392.797	354.959	304.508	236.038	192.795	140.542	27		Iap5-1solo - Indv. I	23	50	2.1	0.8	1.42	0.3	11.4	0.33	283	466	21864	160	2.8
Iap5-1solo - Indv. 6	97.2983	308.111	403.608	344.148	268.471	190.993	142.344	27.2
Iap5-1solo - Indv. 7	111.713	353.157	385.589	329.733	259.462	192.795	192.795	26.3
Iap5-1solo - Indv. 8	79.2801	376.58	358.562	331.535	284.688	187.389	163.966	26.3
Iap5-1solo - Indv. 9	100.902	345.949	335.139	335.139	329.733	180.182	178.38	26.1
Iap5-1solo - Indv. 10	111.713	394.599	354.959	374.779	293.697	194.597	196.398	30.1
Iap5-1solo - Indv. 11	106.307	154.957	200.002	192.795	172.975	136.938	145.947	24.1
Iap5-1solo - Indv. 12	109.911	250.453	281.084	254.057	158.56	118.92	142.344	22.3
