# Supplementary material for: A spontaneous genetically induced epiallele at a retrotransposon shapes host genome function
Source: eLife journal article supplement (doi:10.7554/elife.65233), 2021-03-23
Supplement: supp [file elife-65233-supp-v1.zip]

# IAP-*Pgm2*

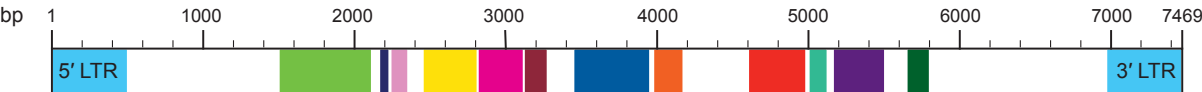

Long terminal repeats (LTRs)

Gag gene protein p24

Zinc knuckle (zf-CCHC)

GAG-polyprotein viral zinc-finger

dUTPase

Retroviral aspartyl protease

G-patch domain

Reverse transcriptase

Reverse transcriptase thumb domain

RNase H

Integrase Zinc binding domain

Integrase core domain

Integrase DNA binding domain
