# Supplementary material for: A spontaneous genetically induced epiallele at a retrotransposon shapes host genome function
Source: eLife. 2021 Mar 23;10:e65233. doi: 10.7554/eLife.65233 (PMC8084528; doi:10.7554/eLife.65233)
Supplement: Supplementary file 1. [file elife-65233-supp1.xlsx]

## Sheet: Sheet1
PCR primers.
Locus	PCR forward primer	PCR reverse primer
IAP-Pgm2 amplification
IAP-Pgm2_P1	ACTTCTCTAACAACGTTGAGCA	CAAAGGCCTTAACTCAGCGG
IAP-Pgm2_N1	GAGGGGCTAGGTGGGAATAC	CCTGTATCAGAAATTTGGACC
IAP-Pgm2_P2	AGTCCTACAATGTGCCAACTT	GCATTCAATGTTTACCTGCCAC
IAP-Pgm2_N2	AGAAGCTCTTTTGCCAGTGAG	TTTCTCTTGGCGCACAGTTC
IAP-Pgm2_P3	ACTTCTCTAACAACGTTGAGCA	GCATTCAATGTTTACCTGCCAC
IAP-Pgm2_N3	GAGGGGCTAGGTGGGAATAC	TTTCTCTTGGCGCACAGTTC
Genotyping
Iap5-1full	TTTCATGAAGGTTCAGTGTCCT	CAACAATCCATACTCAAGTGTCC
Iap5-1solo	CAATGGCATGTGCTTAGTGG	CAACAATCCATACTCAAGTGTCC
Both Iap5-1 variants	CCAAGAGAAGAGAAATTACCTGGA	TCACGGGAAAGGTAGAGTAC
Sry	GCAGGCTGTAAAATGCCACT	TTCCAGGAGGCACAGAGATT
Sanger sequencing primers.
Primer ID	Sequence
IAP-Pgm2_S1	GAGCAAGAGCCAGCTGTTTT
IAP-Pgm2_S2	CAATGGCATGTGCTTAGTGG
IAP-Pgm2_S3	CCAAGAGAAGAGAAATTACCTGGA
IAP-Pgm2_S4	ACATTCGCCGTCACAAGAT
IAP-Pgm2_S5	CTCTCTCGCTGGCATCTCTC
IAP-Pgm2_S6	ATTGAAGGGGCTTTCGTTTT
IAP-Pgm2_S7	CCAGTGAGTACAGCTTTACGAGGT
IAP-Pgm2_S8	GGCCTTTCCAAGGGTCTT
IAP-Pgm2_S9	GAAGAAGCAGCCCATTACCA
IAP-Pgm2_S10	CTGCGTAGTGCGTCAGCAAT
IAP-Pgm2_S11	CGTAAATACGGAACCAATGC
IAP-Pgm2_S12	GCAGCTGCTTTGACTCCAG
IAP-Pgm2_S13	AGCTGCGCCTCTGATAGAAC
IAP-Pgm2_S14	GGAAAGCCTGGGCATTTTA
IAP-Pgm2_S15	ACCCAGGAAGCAGTCAGAGA
IAP-Pgm2_S16	GTCCTGTGCTCAAGCCCTAA
IAP-Pgm2_S17	TCCTTGATACCGGAGCAGAT
IAP-Pgm2_S18	AGGACAGCAAGGGAAATTCA
IAP-Pgm2_S19	TCCAGTGTGGGTTCCTCAAT
IAP-Pgm2_S20	GGGGTCTCCCTGTACTTTCC
IAP-Pgm2_S21	GAGGGAACAATTCCCCTCTT
IAP-Pgm2_S22	TGTGCCAACTTTATGTGCAAG
IAP-Pgm2_S23	TTTTCAAAAGCTGTTGGGAGAT
IAP-Pgm2_S24	TGGCAGCCACATCTAATGAT
IAP-Pgm2_S25	CCTCAAGTGGTAGAATGTTTAGTGG
IAP-Pgm2_S26	TAGAGCCCATTCAGGCCTAC
IAP-Pgm2_S27	AAAGCTGCTGTGAGTTCTTGC
IAP-Pgm2_S28	TCAAAAATTCCAACAGTTCTGC
IAP-Pgm2_S29	CCAGATAGGCCCAATGAGAT
IAP-Pgm2_S30	GTCCCTCGTCTTGGTGATGT
IAP-Pgm2_S31	GACAGCCTTGGCTCTGTCTG
IAP-Pgm2_S32	TGGATGGCTGAATTTGAACA
IAP-Pgm2_S33	AATAGGTCGCTGGCCACTC
IAP-Pgm2_S34	TTTCATGAAGGTTCAGTGTCCT
IAP-Pgm2_S35	TAATCTGCGCATGAGCCAAG
IAP-Pgm2_S36	TCTCTCGCTGGCATCTCTCT
IAP-Pgm2_S37	GGACACTTGAGTATGGATTGTTG
IAP-Pgm2_S38	CGGCAGCTATCAGAACACAA
Pyrosequencing primers.
Locus	PCR forward primer	PCR reverse primer	Pyrosequencing primer
IAP-Pgm2_5′ LTR	GTTTGGTTTTTATATAGAAGGAAAGAAGAA	[Btn]ACAAATAATCATAAAATACCCTTAACTCAT	ATGTTTGTTTGTTGGG
IAP-Pgm2_5′ border_CpG-1	AGTAAGATAGTGGAATTATGAGAGAA	[Btn]ACATTTCTTTTCTTCTTTCCTTCTATAT	ATAAAAATGAAGATGTATAATTAGA
IAP-Pgm2_5′ border_CpG-2	TTTTTATGGGTTTTGGGGATTAAATTGAAG	[Btn]CTCTAACCACACAAATACCCTAACATAAAC	AGTAAGTGTTTTTAGGGT
IAP-Pgm2_5′ border_CpG-3,-4	TTATAGATTTTTTATTGTAAAGGGGGTGGT	[Btn]CTCTAACCACACAAATACCCTAACATAAAC	GGGGTGGTGTTAGTA
IAP-Pgm2_5′ border_CpG-5,-6,-7	AGAGTAAAGGAGGTTTGTAGAGTAT	[Btn]ACCCCTCAAATCTACATTTACATTCC	GGTTTGTAGAGTATAGTTTAATG
IAP-Pgm2_5′ border_CpG-8,-9	GGTGGAAAGTTTTTGTGTTAGGAAAATA	[Btn]CTATACTCTACAAACCTCCTTTACTC	GGAAAATAGTGGAGGTTTTA
IAP-Pgm2_3′ LTR	TGGTTTTTAAAGATGTAAGTAATAAAGTT	[Btn]ACAACAATCCATACTCAAATATCC	GTAGAAGATTTTGGTTTGT
IAP-Pgm2_3′ LTR_CpG1,2,3	TGGGTATATTTTTAAATTGAGGTTGAGTT	[Btn]ATAACAAAAACCTAAAACAACTAATCC	AGATGGTTATAGTTATTATGTG
IAP-Pgm2_3′ LTR_CpG4,5	AGGGTAAAGTATTTGATAAGAGGAAGAG	[Btn]AAACCACAAAAAAACCAACTACTT	ATTTGATAAGAGGAAGAGTT
IAP-Pgm2_3′ LTR_CpG6,7	AGAAGTTGAAAAAGGTATTTAATGTTTATT	[Btn]AAAAACTCTTCCTCTTATCAAATACT	TGTTATTTTTTTAATAAATTGATAG
IAP-Pgm2_3′ LTR_CpG8,9,10	GTTATTGTTTTTATTGTTGGGATAAAGTAT	[Btn]CAATCTTCTATACCAAAAAATATCTCCT	GTATAAGGTTAAGGTTGAGAA
Clonal bisulphite sequencing primers.
Locus	Forward primer	Reverse primer
Iap5-1full_5′ end	AGTGGGATTTTAGTTTGGTTTTT	TCTCTCTCCCCGCTTTACTTC
Iap5-1full_3′ end	GGTTAGGGTTGTTTTGGGTAAA	AACCATCTTTATAATAACTCAACCTCA
Iap5-1solo_entire LTR	AGTGGGATTTTAGTTTGGTTTTT	CTCAACCTCAATTTAAAAATATACCC
qPCR primers.
Locus	PCR forward primer	PCR reverse primer
RT-qPCR
β-actin_exon 6	ACGCAGCTCAGTAACAGTCC	GTGGATCAGCAAGCAGGAGT
Hprt1_exon 9	GAGGAGTCCTGTTGATGTTGCCAG	GGCTGGCCTATAGGCTCATAGTGC
Pgm2_exon 9	GGGATGGTGGCTCTTCACTT	CCTTCCTTCAGGGCTATGGC
Rell1_exon 7	ATAGCCCAGCCCTCTCTTCA	CCCTTGAGACTTCCGCTGTT
Tbc1d1_exon 3	CCTTCTCACAGCCTGGACTG	TCCATGTCTGTGGGCTGAAC
5830416l19Rik_exon 3	CTGGAGGCGGACATTTCACT	CACCTGCTTAGCTCTGCCTT
5' border_1	GAGGGGCTAGGTGGGAATAC	GCACACAGGGACACTCGATA
5' border_2	ACCTGGACAGAGGAGCAAGA	TAGGATCCCACTAAGCGATCA
3' border_1	GGGAATTTTCTAAGGACACTTGA	GCTGCCGCTTCTATTTTGTC
3' border_2	AGCATTAAAGAACTGTCATGTGTC	TGTGTGTGCACGCATTTTTA
ChIP-qPCR
Iap5-1_5' end	ACAGCTGGCATGGTCTCTTC	CTCCCAACAGACAGGCATTT
Iap5-1_3' end	GCGTGAGAACGCGTCTAATA	ATGCCCAGAGGTTTGTTTTC
SINE-Rbak_5' end	ACCAAAGTCCTGGGGTTAGC	TTGTAAGCTGCCAAACATGG
IAP-Asxl3_5' end	CACATGCGCAGATTATTTGTTT	CCAAAATACTACGCCAGTGTCA
Gapdh promoter	CATCCAGGGACGTGCTGACT	TGTGTTCTCCCCTCACTGATCTC
GEO accession numbers for ChIP-seq datasets.
GEO accession number	Antibody	Cells
GSM3173720	HA (Gm14419-HA)	B6 ES cells
GSM3173728	HA (Gm8898-HA)	B6 ES cells
GSM3173732	HA (Zfp429-HA)	F9 EC cells
GSM3173661	KAP1	B6 ES cells
GSM3173662	KAP1	B6 ES cells
GSM3173663	KAP1	B6 ES cells
