# Supplementary figures and images for: A spontaneous genetically induced epiallele at a retrotransposon shapes host genome function
Source: eLife journal article supplement (doi:10.7554/elife.65233), 2021-03-23

A

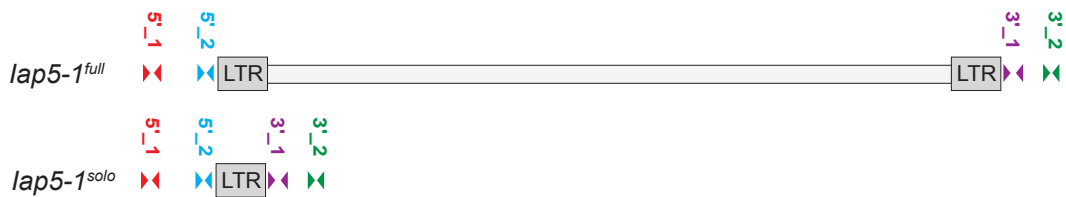

B

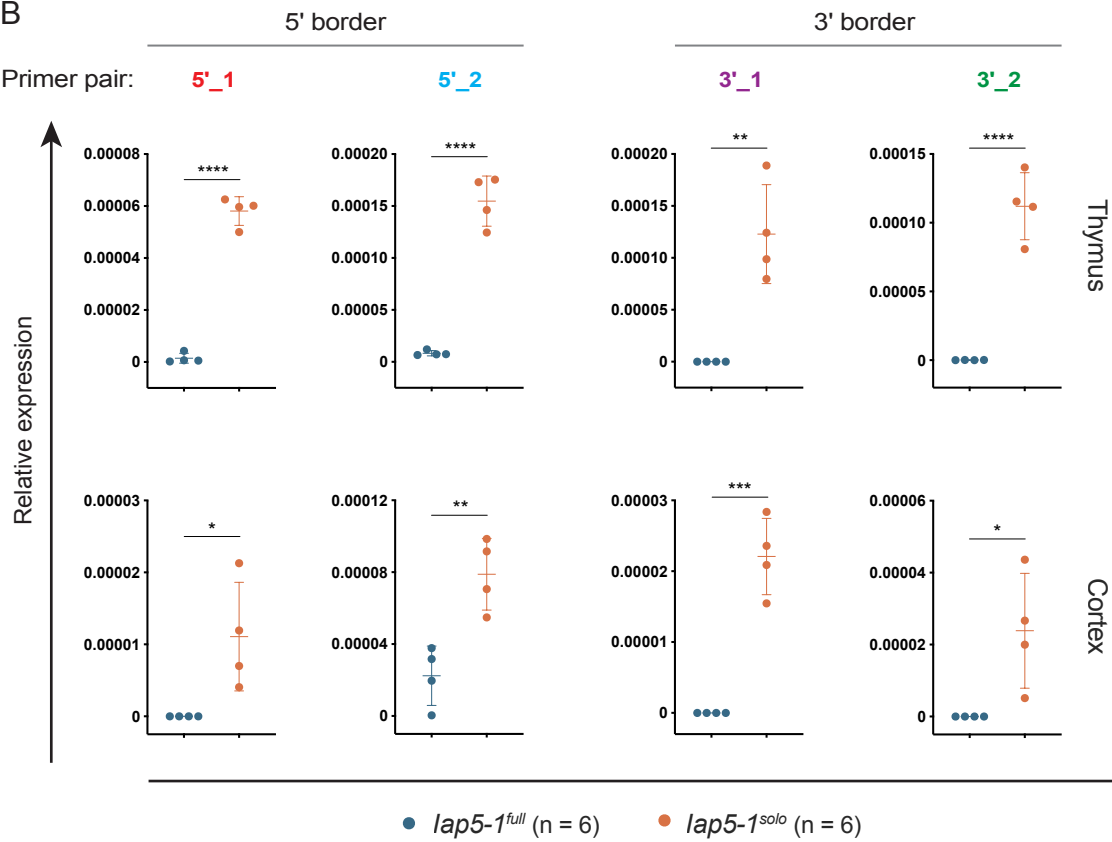

Supplement: supp [file elife-65233-supp-v1.zip]

A

Intra-chromosomal

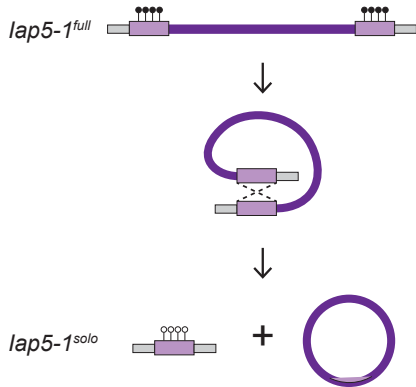

B

Inter-chromosomal

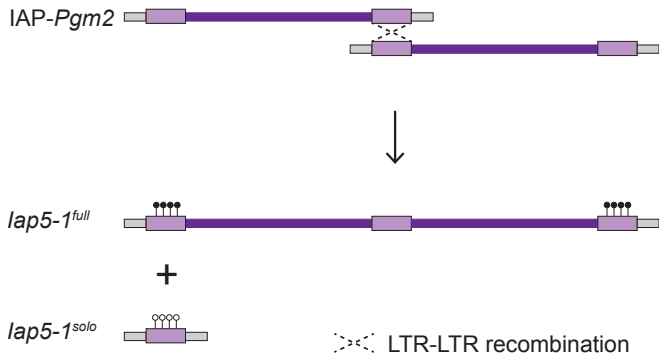

Supplement: supp [file elife-65233-supp-v1.zip]

Males (n = 11)

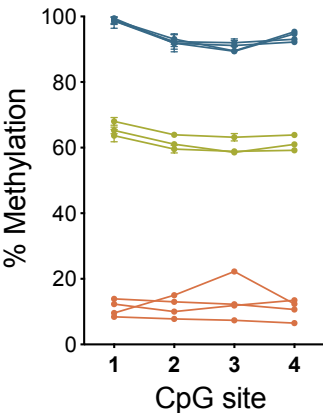

Females (n = 11)

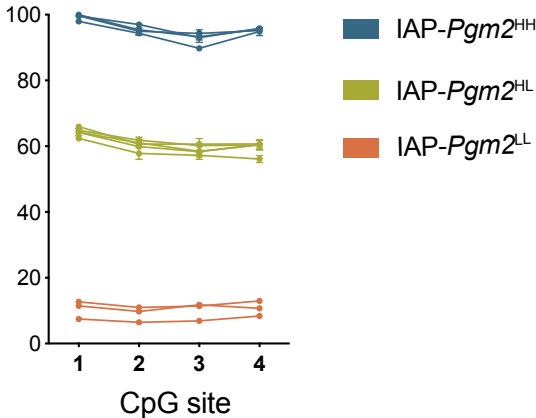

Supplement: supp [file elife-65233-supp-v1.zip]

A

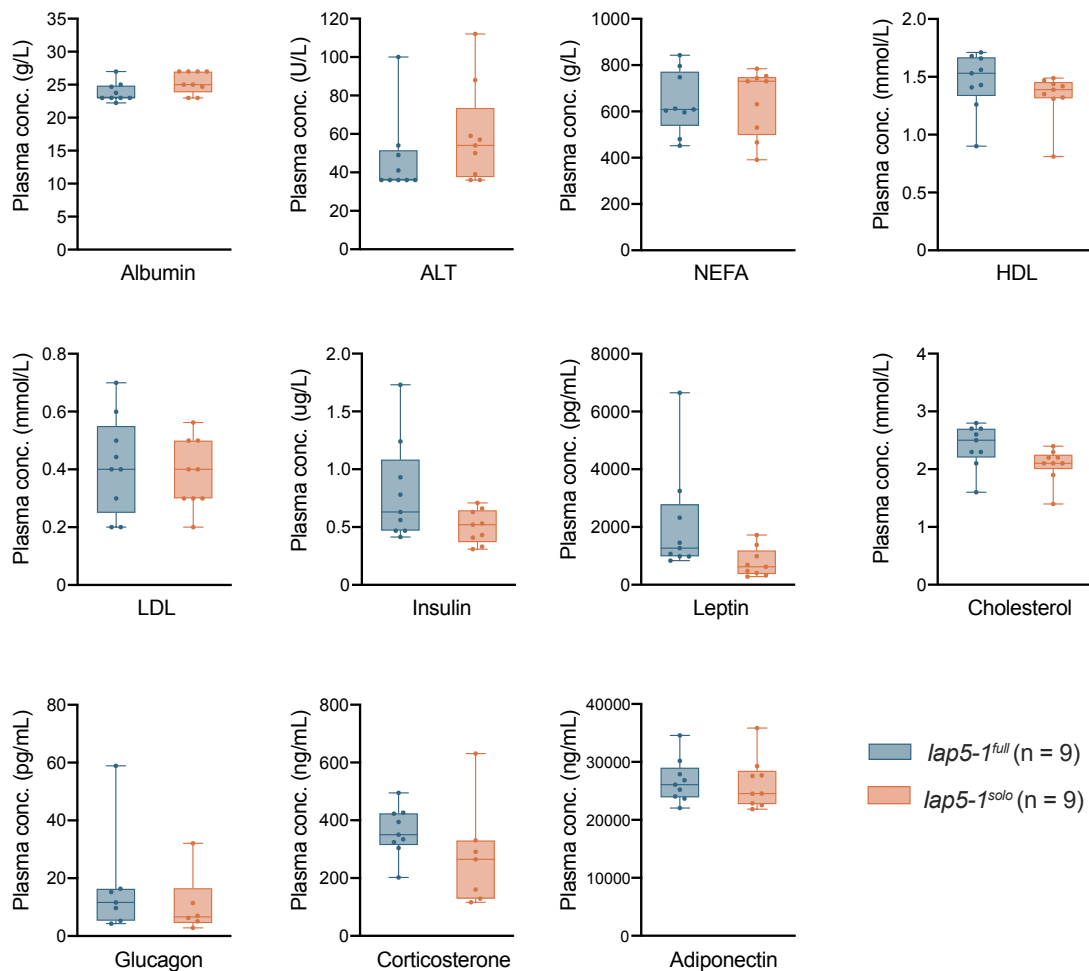

B

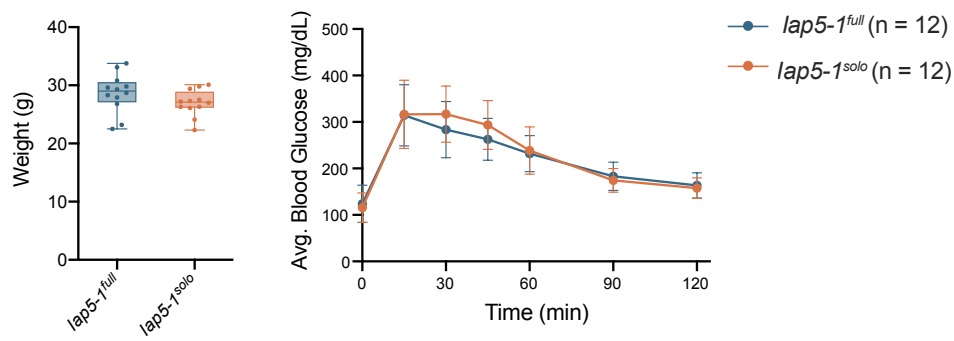

Supplement: supp [file elife-65233-supp-v1.zip]

A *lap5-1<sup>full</sup>*

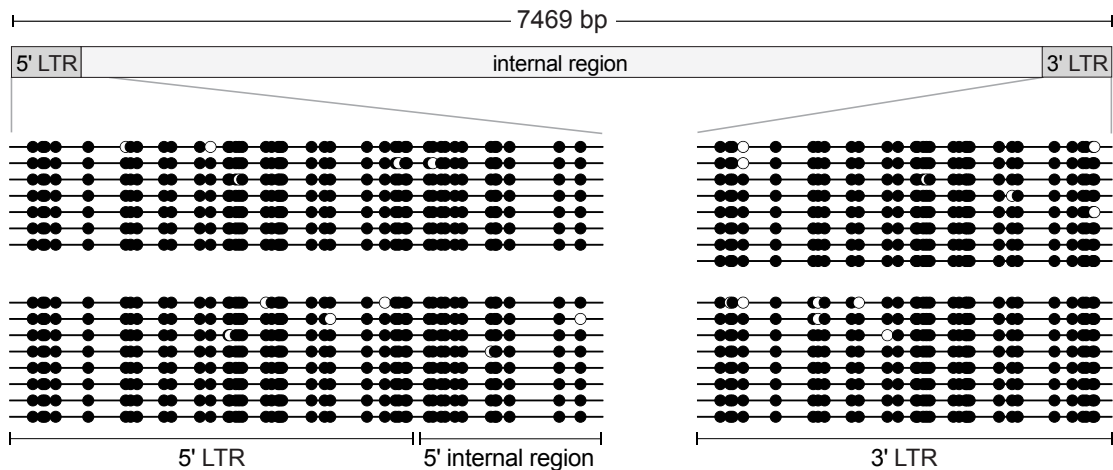

B *lap5-1<sup>solo</sup>*

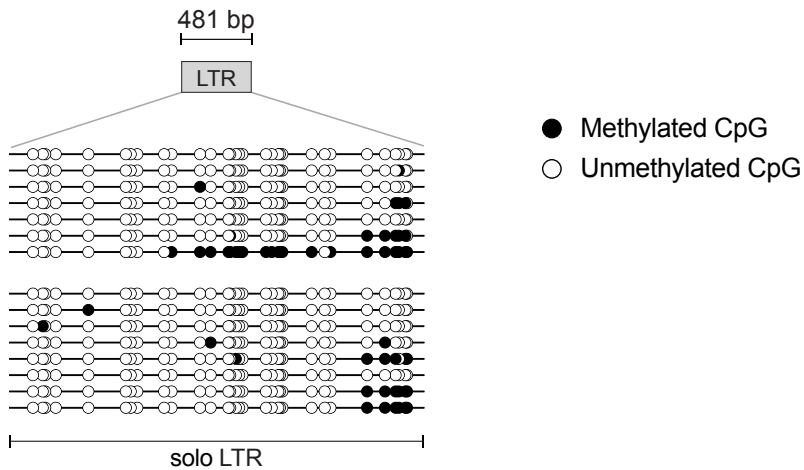

Supplement: supp [file elife-65233-supp-v1.zip]

- Control diet (38 offspring, 8 litters)
- Methyl supplemented diet (41 offspring, 8 litters)

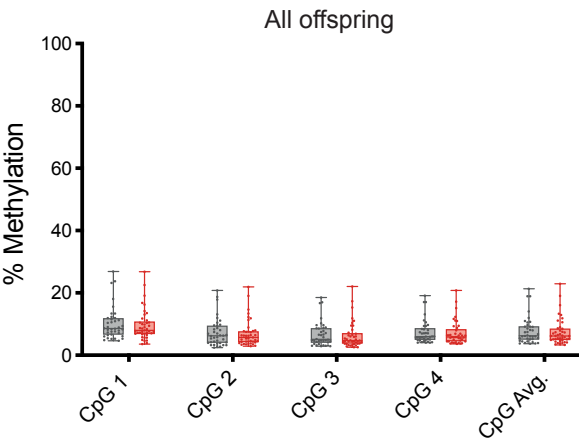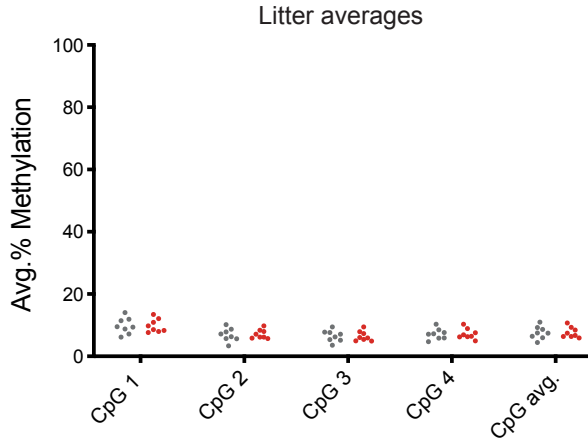

Supplement: supp [file elife-65233-supp-v1.zip]
